# Supplementary material
Source: publisher figshare collection journal article supplement (https://acs.figshare.com/ndownloader/files/7804066)

## Supporting Information

### A Novel n-Type Organosilane – Metal Ion Hybrid of Rhodamine-B and Copper Cation for Low Temperature Thermoelectric Materials

John R Bertram,<sup>†</sup> Aubrey Penn,<sup>†</sup> Matthew J Nee,<sup>† \*</sup> and Hemali Rathnayake.<sup>†,‡\*</sup>

<sup>†</sup>Department of Chemistry, Western Kentucky University, Bowling Green, KY 42101; <sup>‡</sup>Department of Nanoscience, University of North Carolina at Greensboro, Greensboro, NC, 27401

#### Corresponding Authors

\*<sup>†</sup>Matthew Nee, Department of Chemistry, Western Kentucky University, Bowling Green, KY, 42101, E mail: matthew.nee@wku.edu, Tel: 270-745-0114

\*<sup>†,‡</sup>Hemali Rathnayake, Current Address: Nanoscience Department, University of North Carolina at Greensboro, NC, 27410, [hprathna@uncg.edu](mailto:hprathna@uncg.edu), Tel. Phone: 336-285-2860

**Table S1.** Difference in geometry optimization calculation energies, relative to the optimum, of RBS with Cu<sup>2+</sup> in various positions. Position 6 proved to be the optimum by 0.87 eV. The Cu<sup>2+</sup> location for this minima is located between the O and N of RBS, exhibiting Schiff-base behavior of the Cu-RBS complex.

| Position | $\Delta E$ (eV) |
|----------|-----------------|
| 1        | 0.87            |
| 2        | 1.40            |
| 3        | 1.60            |
| 4        | 2.13            |
| 5        | 2.80            |
| 6        | 0               |
| 7        | 1.20            |

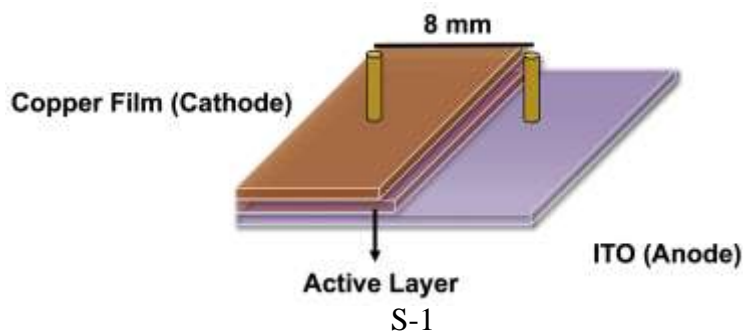

**Figure S1:** A schematic diagram of the device structure used to conduct electric and thermoelectric property measurements.

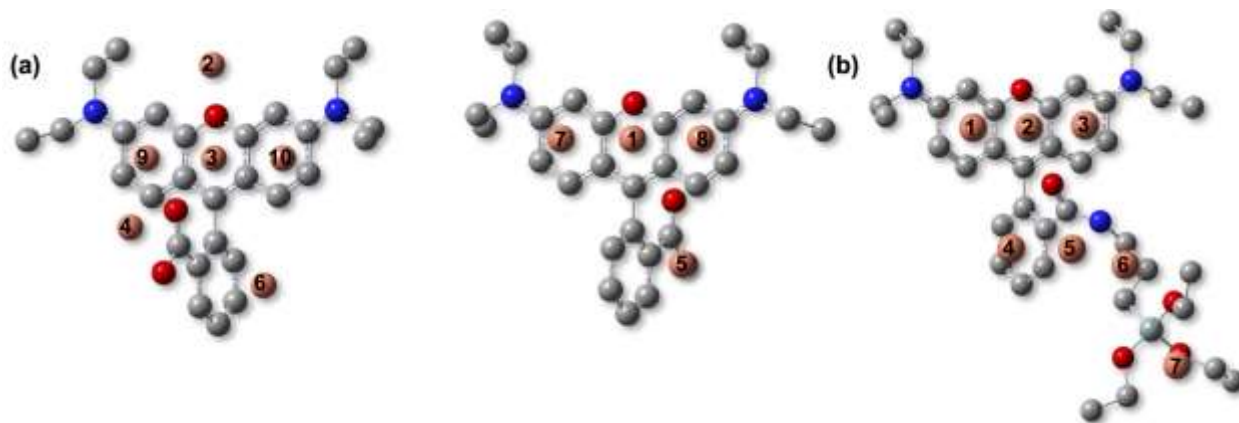

**Figure S2:** Optimized geometries of RB (a) and RBS (b) with the Cu atom in various locations used to elucidate the minimum energy, and therefore most likely, position of  $\text{Cu}^{2+}$  relative to each molecular structure. The optimum for RB was found to be position 9, with  $\text{Cu}^{2+}$  isolated to the xanthene ring structure on the same side as the benzoic acid portion of RB. Position 6 was found to be the minimum for RBS, with  $\text{Cu}^{2+}$  located next to the N and O of the silane tail.

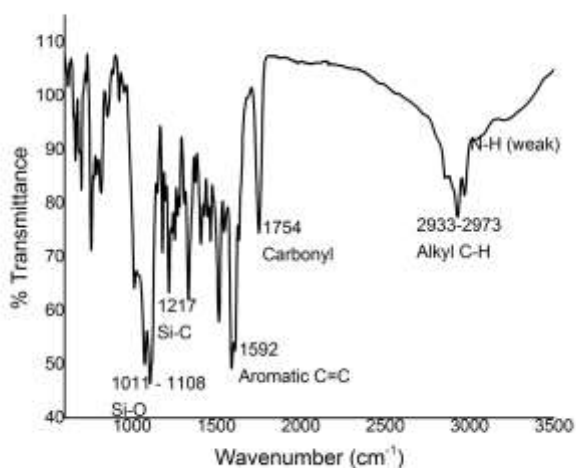

**Figure S3:** FT-IR spectrum of Rhodamine-B silane.

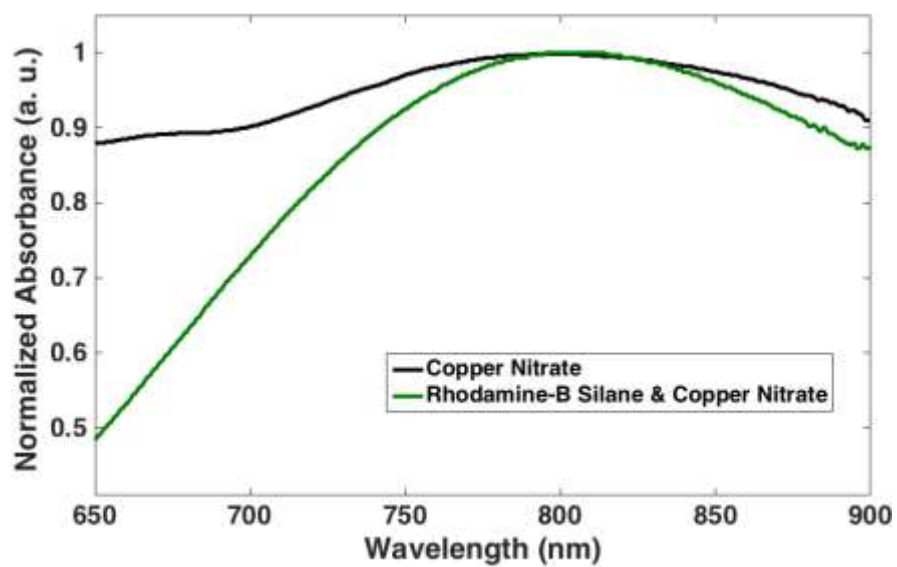

**Figure S4:** UV-visible spectra for  $\text{Cu}^{+2}$  and Cu-RBS complex in water exhibiting a slight blue-shift in absorbance. This observation provides further evidence that  $\text{Cu}^{2+}$  forms a Schiff-base complex with RBS.  $\pi$ -electron donation from  $\text{Cu}^{2+}$  onto RBS stabilizes the metal d-orbitals, resulting in an increase in the energy barrier between the  $t_{2g}$  and  $e_g$  d-d electronic transition.

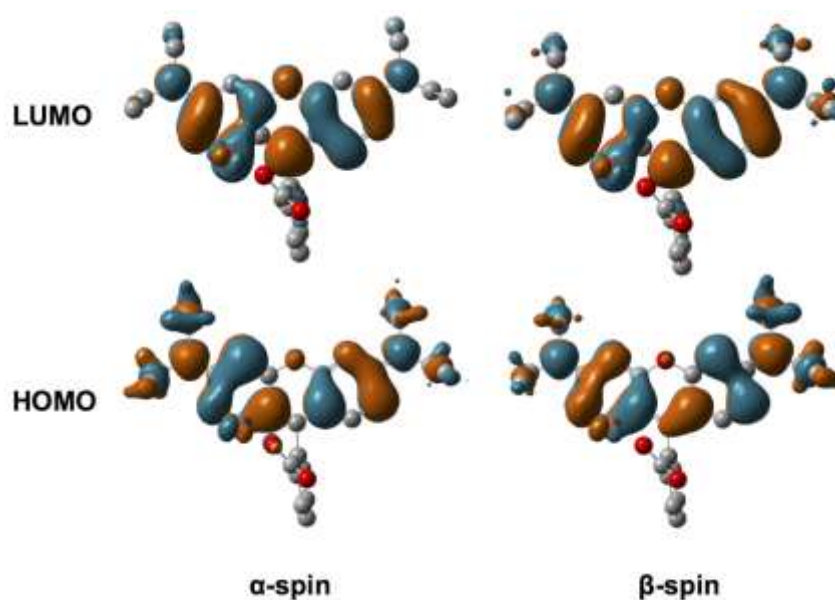

**Figure S5:** Alpha- and beta-spin molecular orbital contours of the lowest energy transition for Cu-RB elucidated by B3LYP method 6-31G basis set while using LANL2DZ for  $\text{Cu}^{2+}$  only. The

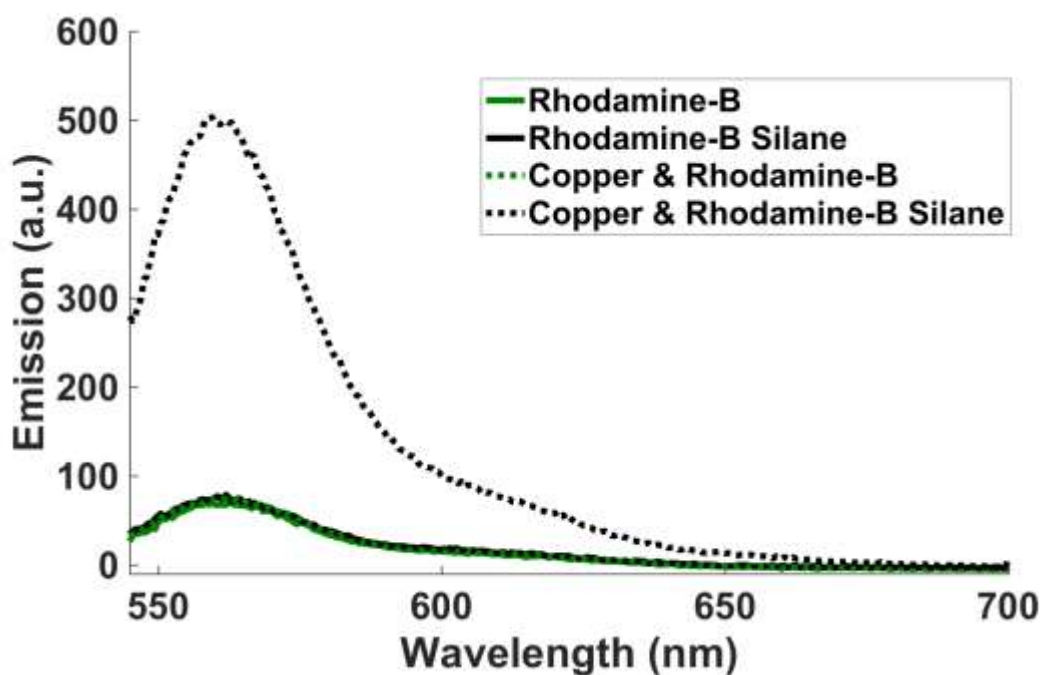

contours indicate that a metal-to-ligand charge transfer is unique to Cu-RBS.

**Figure S6:** Fluorescence emission spectra of RB, RBS, Cu-RB, and Cu-RBS displaying the large increase in emission upon complexation of  $\text{Cu}^{2+}$  to RBS, which is not observed for any other species.

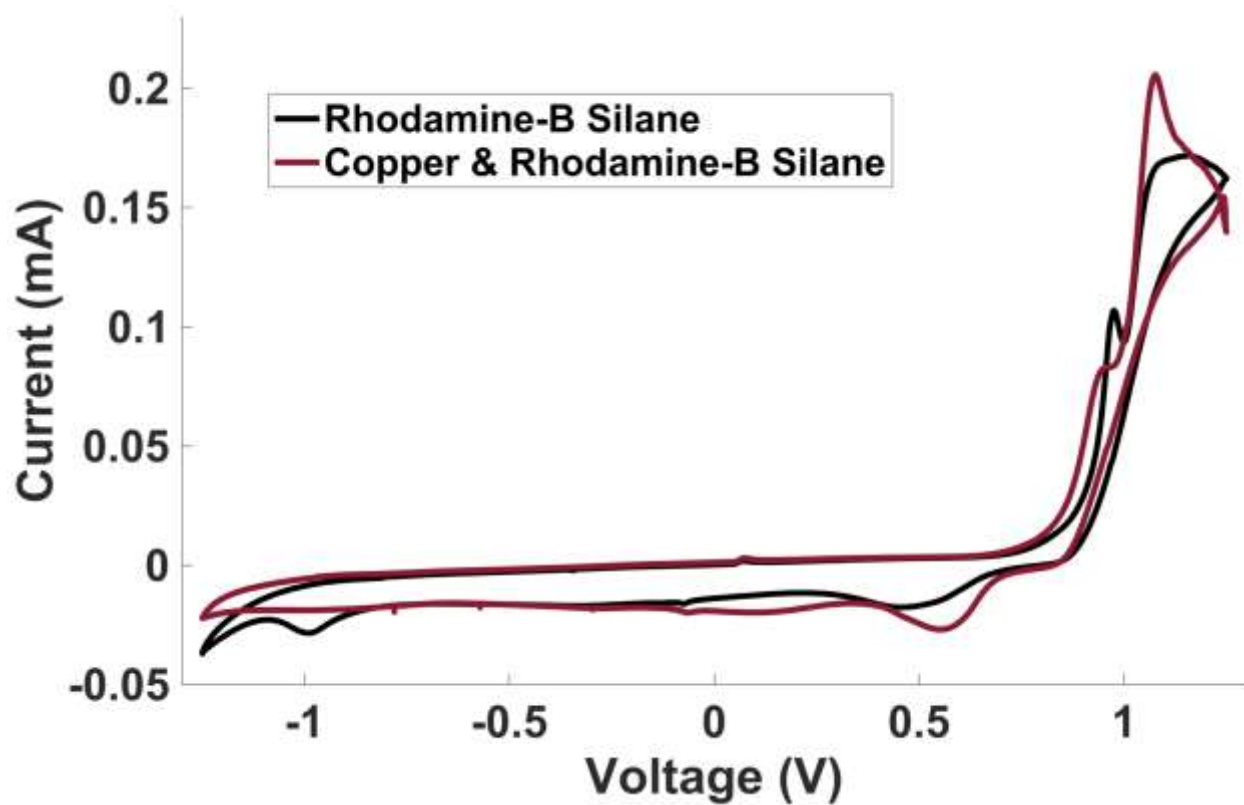

**Figure S7:** Cyclic voltammetry graphs for RBS and Cu-RBS.

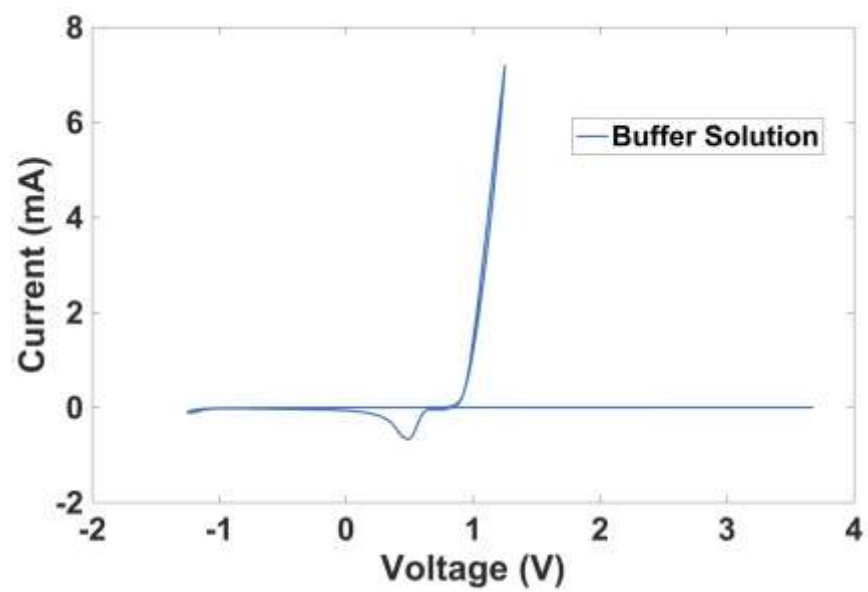

Supplement: Supplementary file 1 [file 7804066]
